# Supplementary material
Source: HighWire-hosted journal article supplement (https://www.annfammed.org/content/suppl/2019/01/22/17.1.86)
Supplement: Ukhanova_Supp_App.pdf [file Ukhanova_Supp_App.pdf]

## Supplemental materials for:

Ukhanova M, Heintzman J, Tseng A, Yamashita D, Likumahuwa-Ackman S, DeVoe J. Partnering research fellows and clinicians in practice settings. *Ann Fam Med*. 2019;17(1):xxx-xxx.

## Corresponding author

Maria Ukhanova, MD, PhD  
Oregon Health & Science University  
Department of Family Medicine  
3181 SW Sam Jackson Park Rd, Portland, OR, 97239  
[ukhanova@ohsu.edu](mailto:ukhanova@ohsu.edu)  
Tel: +1-520-2456163

**Key words:** research capacity, primary care research, organizational innovation, researcher-in-residence

## References

1. Werner JJ. Measuring the impact of practice-based research networks (PBRNs). *JABFM*. 2012;25(5):557-559.
2. Haggerty T, Cole AM, Xiang, J, Mainous AG III, Seehusen D. Family medicine-specific practice-based research network productivity and clinical and translational sciences award program affiliation. *Southern Med J*. 2017;110(4):287-292.
3. Misra S, McElroy JA, Hosokawa MC. Lessons from a successful collaboration between a researcher and a clinician. *Fam Med*. 2013;45(5):357-358.
